# Supplementary material
Source: ML conference proceedings conference paper supplement (https://openaccess.thecvf.com/content/WACV_2020/html/Luiten_UnOVOST_Unsupervised_Offline_WACV_2020_paper.html)
Supplement: Supplementary file 1 [file Luiten_UnOVOST_Unsupervised_Offline_WACV_2020_supplemental.pdf]

Archive with 25 entries (22 files):
- DAVIS2017/
- DAVIS2017/Unsupervised/
- DAVIS2017/Unsupervised/Val/
- DAVIS2017/Unsupervised/Val/gold-fish.gif
- DAVIS2017/Unsupervised/Val/drift-chicane.gif
- DAVIS2017/Unsupervised/Val/dogs-jump.gif
- DAVIS2017/Unsupervised/Val/dance-twirl.gif
- DAVIS2017/Unsupervised/Val/car-roundabout.gif
- DAVIS2017/Unsupervised/Val/camel.gif
- DAVIS2017/Unsupervised/Val/breakdance.gif
- DAVIS2017/Unsupervised/Val/bmx-trees.gif
- DAVIS2017/Unsupervised/Val/bike-packing.gif
- DAVIS2017/Unsupervised/Val/soapbox.gif
- DAVIS2017/Unsupervised/Val/scooter-black.gif
- DAVIS2017/Unsupervised/Val/pigs.gif
- DAVIS2017/Unsupervised/Val/motocross-jump.gif
- DAVIS2017/Unsupervised/Val/mbike-trick.gif
- DAVIS2017/Unsupervised/Val/loading.gif
- DAVIS2017/Unsupervised/Val/judo.gif
- DAVIS2017/Unsupervised/Val/india.gif
- DAVIS2017/Unsupervised/Val/horsejump-high.gif
- DAVIS2017/Unsupervised/Val/lab-coat.gif
- DAVIS2017/Unsupervised/Val/kite-surf.gif
- 0666-supp.pdf
- videos.html
