# Supplementary material
Source: ML conference proceedings conference paper supplement (https://openaccess.thecvf.com/content/WACV_2020/html/Luiten_UnOVOST_Unsupervised_Offline_WACV_2020_paper.html)
Supplement: Supplementary file 1 [file Luiten_UnOVOST_Unsupervised_Offline_WACV_2020_supplemental.pdf › 0666-supp.pdf]

# Supplemental Material: UnOVOST: Unsupervised Offline Video Object Segmentation and Tracking

Jonathon Luiten\* Idil Esen Zulfikar\* Bastian Leibe

Computer Vision Group, RWTH Aachen University

{luiten, leibe}@vision.rwth-aachen.de idil.esen.zulfikar@rwth-aachen.de

## A. Adapting UnOVOST to Video Instance Segmentation

We adapt UnOVOST to the Video Instance Segmentation (VIS) domain in the following way.

**Detection.** For detection we adapt the Mask R-CNN [2] detector to the YT-VIS benchmark to detect the 40 object classes.

To adapt this network to VIS, we created a training set by combining the YT-VIS [7], COCO [4] and OpenImages [3] datasets. We trained this detector on 39 classes, the 40 classes of YT-VIS with “monkey” and “ape” combined. This is because OpenImages only has a class which is a mix, and because in the YT-VIS training set it is unclear exactly what the difference between these two classes should be (e.g. baboons are labeled as both ape and monkey, some gorillas mislabeled as monkeys). Thus we detect these classes together and rely on our classifier later to distinguish between the two.

For COCO we use the 19 classes which overlap with the YT-VIS classes. The “bird” class was set to ignore regions (as multiple birds such as owl, eagle and duck are in YouTube-VIS). We map the OpenImages classes to YouTube-VIS classes, with all of our 39 classes being mapped to by at least one OpenImages class. We only use images that contain at least one annotation from our 39 classes that is not a person (because of too many people in OpenImages). We set all of the background of OpenImages images to be ignore regions and we don’t sample negatives from this dataset (as OpenImages is not densely annotated). We reweight how often we sample each image during training for class balancing. Classes are sampled such that in one epoch there are at least 5000 examples of each class. This results in sharks being sampled 18 times more often than horses. Also images from the YT-VIS dataset are sampled three times more often than those in COCO and OpenImages.

**Classification.** The classification branch our Mask R-CNN detector works reasonably well, but still often misclassifies

|                     | mAP         | AP50        | AP75        | AR1         | AR10        |
|---------------------|-------------|-------------|-------------|-------------|-------------|
| Ours                | <b>46.7</b> | <b>69.7</b> | <b>50.9</b> | <b>46.2</b> | 53.7        |
| foolwood            | 45.7        | 67.4        | 49          | 43.5        | 50.7        |
| bellejuillet        | 45          | 63.6        | 50.2        | 44.7        | 50.3        |
| linhj               | 44.9        | 66.5        | 48.6        | 45.3        | <b>53.8</b> |
| minmingdii          | 44.4        | 68.4        | 48.7        | 43.6        | 50.8        |
| xiAaonice           | 40          | 57.8        | 44.9        | 39.6        | 45.2        |
| guwop               | 40          | 60.8        | 43.9        | 41.2        | 49.1        |
| exing               | 39.7        | 62.1        | 42.6        | 41.4        | 46.1        |
| MaskTrack R-CNN [7] | 32.3        | 53.6        | 34.2        | 33.6        | 37.3        |

Table 1. Results in the 2019 YouTube-VIS Challenge, compared to top 8 other participants, and the previous state-of-the-art.

examples. To improve this, we use a ResNeXt-101 32x48d classifier [6] pretrained on 940 million Instagram images [5], before being trained on ImageNet [1]. We then defined a mapping of ImageNet (INet) classes to YT-VIS classes.

This mapping results in 310 of the 1000 INet classes being mapped to our 40 YT-VIS classes, with 123 INet classes being mapped to dog and 20 to truck. Some classes are not represented (person, skateboard, giraffe, hand and surfboard). Some INet classes are mapped to multiple YT-VIS classes, e.g. “Amphibious vehicle” being mapped to both boat and truck. There are 11 INet classes mapped to just monkey, 2 to just ape and 7 to both due to the ambiguity in YT-VIS as to what is a ape and what is a monkey.

The final INet classification score for each YT-VIS class is then the sum of the classification scores for all of the contributing INet classes.

The final classification scores were then a weighted combination of the scores from our Mask R-CNN detector and our INet trained classifier.

**Segmentation.** We finetune the segmentation head of Mask R-CNN on the YT-VIS dataset separately for the 40 classes.

**Tracking.** We use UnOVOST exactly as in the main paper for unsupervised VOS with exactly the same parameters. The only difference is that different input proposals are input to UnOVOST.

**Putting it all together.** In VIS segmentations are allowed to overlap, thus when we are not sure which class a track be-

\*Equal Contribution

longs to we propose the existence of the same track multiple times with different classes and scores.

To obtain a track's score for each class, we average the class scores for the mask in each timestep. Frames with no masks are given 0 score thus short tracks are down weighted. We do this for both detection scores and INet scores. The final score is the weighted average of these two scores (with equal weighting). We output each track multiple times for every class with a score greater than 0.0001. Note that the detector doesn't discriminate between apes and monkey, so the one detection score is used for both. Also our INet classifier doesn't give scores for 5 of the 40 classes, so for these we only use detector scores.

## References

- [1] J. Deng, W. Dong, R. Socher, L.-J. Li, K. Li, and L. Fei-Fei. Imagenet: A large-scale hierarchical image database. In *CVPR*, 2009.
- [2] K. He, G. Gkioxari, P. Dollár, and R. Girshick. Mask R-CNN. In *ICCV*, 2017.
- [3] A. Kuznetsova, H. Rom, N. Alldrin, J. Uijlings, I. Krasin, J. Pont-Tuset, S. Kamali, S. Popov, M. Mallocci, T. Duerig, et al. The open images dataset v4: Unified image classification, object detection, and visual relationship detection at scale. *arXiv preprint arXiv:1811.00982*, 2018.
- [4] T.-Y. Lin, M. Maire, S. Belongie, J. Hays, P. Perona, D. Ramanan, P. Dollár, and C. L. Zitnick. Microsoft coco: Common objects in context. In *ECCV*, 2014.
- [5] D. K. Mahajan, R. B. Girshick, V. Ramanathan, K. He, M. Paluri, Y. Li, A. Bharambe, and L. van der Maaten. Exploring the limits of weakly supervised pretraining. In *ECCV*, 2018.
- [6] S. Xie, R. Girshick, P. Dollr, Z. Tu, and K. He. Aggregated residual transformations for deep neural networks. *arXiv preprint arXiv:1611.05431*, 2016.
- [7] L. Yang, Y. Fan, and N. Xu. Video instance segmentation. *arXiv preprint arXiv:1905.04804*, 2019.
