# Supplementary material
Source: ML conference proceedings conference paper supplement (https://openaccess.thecvf.com/content/WACV_2020/html/Luiten_UnOVOST_Unsupervised_Offline_WACV_2020_paper.html)
Supplement: Supplementary file 1 [file Luiten_UnOVOST_Unsupervised_Offline_WACV_2020_supplemental.pdf › videos.html]

 UnOVOST - Qualitative Results on DAVIS 2017 Unsupervised 


# UnOVOST - Qualitative Results on DAVIS 2017 Unsupervised Val

Videos are compressed (240 pixels width) to meet the size constraints. The 20 most interesting results videos from the 30 videos in the validation set are shown. The left out videos are typical very simply with only a single object.
